# Supplementary material for: Repurposing of Miltefosine as an Adjuvant for Influenza Vaccine
Source: PubMed Central journal article supplement (PMC7768360; doi:10.3390/vaccines8040754), 2020-12-11
Supplement: vaccines-08-00754-s001.pdf [file vaccines-08-00754-s001.pdf]

**Supplementary Table S1** Vaccines used in this project

| <b>Vaccine</b>                  | <b>Usage</b>                                                                   | <b>Season</b> | <b>Lot No.</b> | <b>Content</b>                                |
|---------------------------------|--------------------------------------------------------------------------------|---------------|----------------|-----------------------------------------------|
| <b>Fluarix®<br/>Tetravalent</b> | Vaccination-<br>challenge model<br><br>(7 days apart)                          | 2014-15       | AFLBA032AA     | A/California/7/2009(H1N1)pdm09-like strain    |
|                                 |                                                                                |               |                | A/Texas/50/2012(H3N2)-like strain             |
|                                 |                                                                                |               |                | B/Massachusetts/02/2012-like strain           |
|                                 |                                                                                |               |                | B/Brisbane/60/2008-like strain                |
| <b>VAXIGRIP®<br/>Trivalent</b>  | Vaccination-<br>challenge model<br><br>(7 days apart) and<br>mechanistic study | 2015          | M7080-2        | A/California/7/2009(H1N1)pdm09-derived strain |
|                                 |                                                                                |               |                | A/Switzerland/9715293/2013(H3N2)-like strain  |
|                                 |                                                                                |               |                | B/Phuket/3073/2013                            |
| <b>Fluarix®<br/>Trivalent</b>   | Vaccination-<br>challenge model<br><br>(3 days apart)                          | 2014-15       | AFLUA864AH     | A/California/7/2009(H1N1)pdm09-like strain    |
|                                 |                                                                                |               |                | A/Texas/50/2012(H3N2)-like strain             |
|                                 |                                                                                |               |                | B/Massachusetts/02/2012-like strain           |
| <b>Fluarix®<br/>Tetravalent</b> | Vaccination-<br>challenge model<br><br>(3 days apart)                          | 2015-16       | AFLBA112AF     | A/California/7/2009(H1N1)pdm09-like strain    |
|                                 |                                                                                |               |                | A/Switzerland/9715293/2013(H3N2)-like strain  |
|                                 |                                                                                |               |                | B/Phuket/3073/2013                            |
|                                 |                                                                                |               |                | B/Brisbane/60/2008-like strain                |

**Supplementary Table S2** Primers used for this project (mouse-specific)

| Gene           | Forward primer (5' to 3') | Reverse primer (5' to 3') |
|----------------|---------------------------|---------------------------|
| $\beta$ -actin | ACGGCCAGGTCATCACTATTG     | CAAGAAGGAAGGCTGGAAAAG     |
| IFN- $\gamma$  | AAGCGTCATTGAATCACACC      | CGAATCAGCAGCGACTCCTT      |
| IL-6           | TGGAGTCACAGAAGGAGTGGCTAAG | TCTGACCACAGTGAGGAATGTCCAC |

**Supplementary Table S3** Antibodies, isotype controls, and streptavidin conjugate used for flow cytometry

| Antigen (mouse) / isotype control           | Fluorochrome    | Clone    | Purchased from |
|---------------------------------------------|-----------------|----------|----------------|
| CD3 $\epsilon$                              | FITC            | 145-2C11 | BioLegend      |
| Armenian Hamster IgG Isotype control        | FITC            | HTK888   | BioLegend      |
| CD4                                         | Alexa Fluor 700 | RM4-5    | BioLegend      |
| Rat IgG2a, $\kappa$ Isotype control         | Alexa Fluor 700 | RTK2758  | BioLegend      |
| CXCR5                                       | Biotin          | 2G8      | BD Biosciences |
| Rat IgG2a, $\kappa$ Isotype control         | Biotin          | R35-95   | BD Biosciences |
| Streptavidin<br>(For detection of CXCR5)    | APC             | N/A      | BioLegend      |
| CD279 (PD-1)                                | PE              | J43      | BD Biosciences |
| Hamster IgG2, $\kappa$ Isotype control      | PE              | B81-3    | BD Biosciences |
| B220<br>(Used for compensation of PE-CD279) | PE              | RA3-6B2  | BioLegend      |

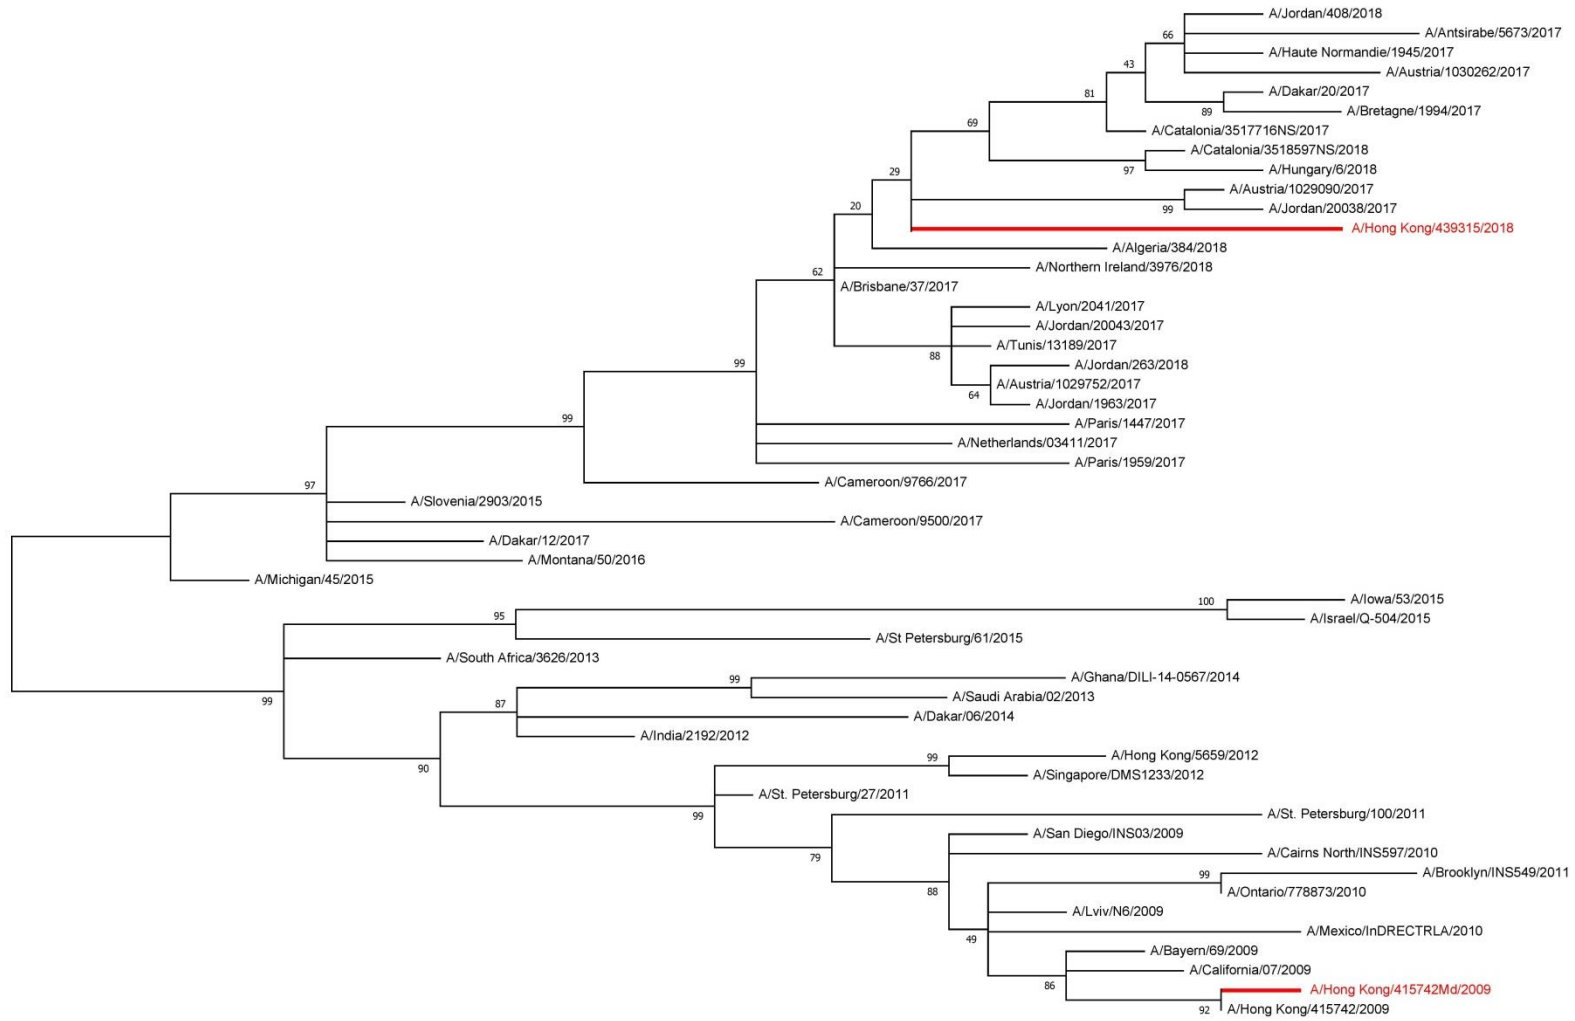

0.0050

**Supplementary Figure S1** Phylogenetic tree of HA showing the genetic relationship of influenza A(H1N1) viruses. The two strains involved in the HAI and MN tests for the antibody responses against antigenically-drifted viruses are highlighted in red. The phylogenetic tree was constructed using the maximum-likelihood method with the Tamura-Nei model. Bootstrap values were calculated from 1000 trees. Evolutionary analyses were conducted in MEGA X [1].

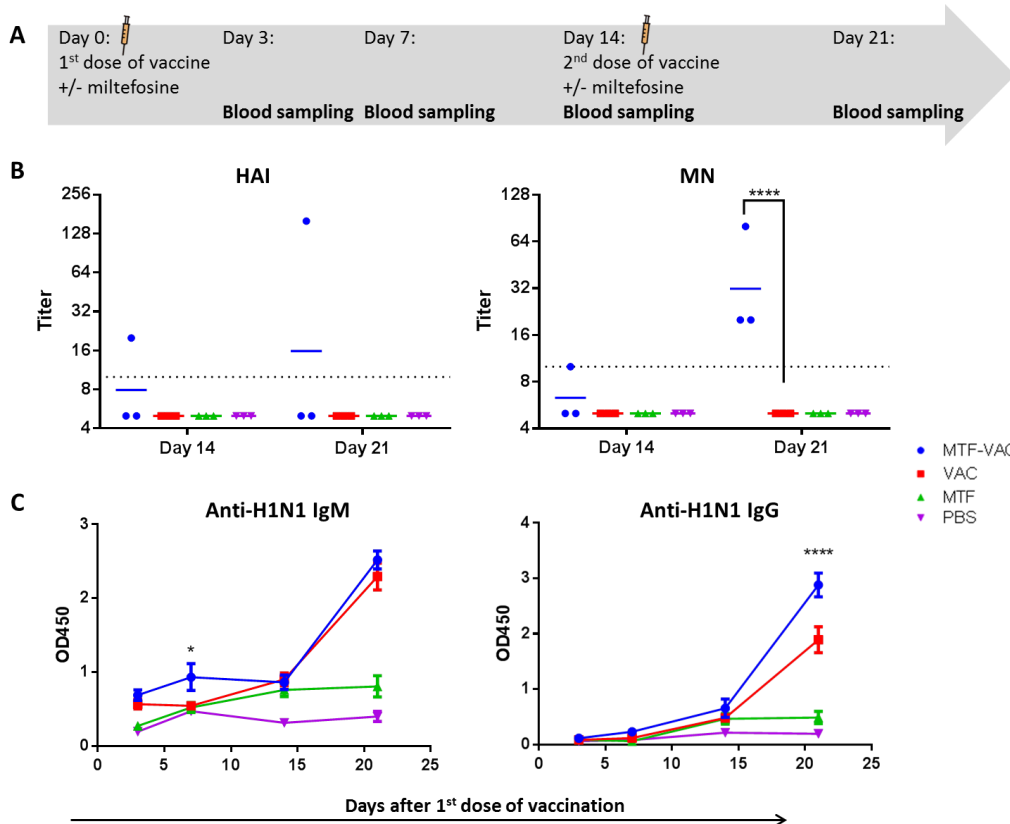

**Supplementary Figure S2** The effect of two doses of vaccines with or without miltefosine on the antibody titers without influenza virus challenge. (A) Schedule of influenza vaccination and sample collection. (B) HAI titers and MN titers of serum samples after vaccination. (C) Anti-H1N1 IgM and anti-H1N1 IgG antibody levels determined by ELISA.

MTF-VAC, miltefosine (0.2 mg) + vaccine group; Vac, vaccine only group; MTF, miltefosine (0.2 mg) only group; PBS, PBS only group. Short solid lines indicate geometric means of titers, and long dashed lines indicate the detection limit of HAI and MN assays. Data collected from 3 mice per group. \* for  $P < 0.05$ ; \*\*\*\* for  $P < 0.0001$ , calculated by two-way ANOVA followed by a Tukey's multiple comparison test.

References:

1. Kumar, S., et al., *MEGA X: Molecular Evolutionary Genetics Analysis across Computing Platforms*. *Mol Biol Evol*, 2018. **35**(6): p. 1547-1549.
